# Supplementary material for: Molecular Mechanisms of the Anti-Inflammatory Effects of Epigallocatechin 3-Gallate (EGCG) in LPS-Activated BV-2 Microglia Cells
Source: MDPI journal article supplement (doi:10.3390/brainsci13040632), 2023-04-07
Supplement: s1 [file s1]

**Supplementary Table S1.** PCR array analysis of cytokines/chemokines correlated to neuroinflammation and oxidative stress.

| Gene of interest                                                                  | Neuroimmunological purpose                                                                                    | References | Associated Signaling Pathway | Downregulated or Upregulated by EGCG | Fold Change t/-                               |
|-----------------------------------------------------------------------------------|---------------------------------------------------------------------------------------------------------------|------------|------------------------------|--------------------------------------|-----------------------------------------------|
| Macrophage migration inhibitory factor (MIF)                                      | Cytokine is implicated in inflammatory processes in Alzheimer's disease.                                      | [1-3]      |                              | downregulated                        | Both EGCG 150 +LPS                            |
| Cytokine C-C motif ligand 2 (CCL2) aka Monocyte chemoattractant protein-1 (MCP-1) | Cytokine has a major role in amyloidogenesis in neurodegenerative disease.                                    | [4, 5]     | NF-κB                        | downregulated                        | EGCG 150 +LPS vs LPS alone 1.44-fold decrease |
| Interleukin 3 (IL-3)                                                              | Glycoprotein is involved in neuronal cell survival and development. It also is neuroprotective via microglia. | [6, 7]     |                              | upregulated                          | EGCG 150 +LPS vs LPS alone 2.33-fold increase |
| Interleukin 11 (IL-11)                                                            | Member of the IL-6 family of cytokines that may exhibit neurorescue capability.                               | [8, 9]     | .                            | upregulated                          | EGCG 150 +LPS vs LPS alone 5.14-Fold increase |

|                                                                                                                                                                                                |                                                                                                                                                                              |          |       |               |                                                      |
|------------------------------------------------------------------------------------------------------------------------------------------------------------------------------------------------|------------------------------------------------------------------------------------------------------------------------------------------------------------------------------|----------|-------|---------------|------------------------------------------------------|
| Interleukin 6 (IL-6)                                                                                                                                                                           | Proinflammatory cytokine prominent in neurodegenerative disorders                                                                                                            | [10]     | NF-κB | downregulated |                                                      |
| Nitric Oxide (NO)                                                                                                                                                                              | Many functions are related to inflammation, cellular survival, and neuronal immunology. It is a prominent biomarker for reactive oxygen species (ROS) and neuroinflammation. | [11, 12] | NF-κB | downregulated |                                                      |
| Colony-stimulating factor 2 (CSF2), aka Granulocyte-macrophage colony-stimulating factor (GM-CSF)<br><br>Colony Stimulating Factor 3 (CSF3), aka Granulocyte colony-stimulating factor (G-CSF) | Cytokine expelled by macrophages is increased in AD patients. It regulates neuroinflammation.                                                                                | [13, 14] | NF-κB | upregulated   | EGCG 150 +LPS vs LPS alone 8.92-fold increase (CSF3) |
| Tumor Necrosis Factor Subfamily, 10 (TNFS10) aka Tumor necrosis, factor-related apoptosis-inducing ligand (TRAIL)                                                                              | The gene associated with the TNF superfamily exhibits proinflammatory properties in AD.                                                                                      | [15]     | NF-κB | upregulated   | EGCG 150 +LPS vs LPS alone 1.62-fold increase        |

**Supplementary Table S2.** PCR array evaluation of signaling pathways linked to neuroinflammation and oxidative stress.

| Gene of interest                                                                                              | Neuroimmunological function                                                                                                             | References | Signaling Pathway | Down/upregulation by EGCG | Fold Change +/-                                                                                                    |
|---------------------------------------------------------------------------------------------------------------|-----------------------------------------------------------------------------------------------------------------------------------------|------------|-------------------|---------------------------|--------------------------------------------------------------------------------------------------------------------|
| Mitogen-activated protein kinase (MAPK) kinase kinase (MAP3k1) and Mitogen-Activated Protein Kinase 3 (MAPK3) | A key constituent of the MAPK/ERK pathway and the regulation of inflammatory processes i.e.apoptosis and lysosomal clearance mechanisms | [16]       | NFkB and mTOR     | downregulated             | EGCG 150 +LPS and EGCG                                                                                             |
| Protein kinase c beta (PRKCB)                                                                                 | Enzyme correlated with mediating NO production via microglial INOS regulation                                                           | [17]       | mTOR              | downregulated             | EGCG 150 +LPS vs LPS alone 4.03 fold decrease                                                                      |
| Mechanistic target of rapamycin (mTOR)                                                                        | Signaling pathway involved in cellular survival, nutrient sensing, autophagy, aging, and inflammation                                   | [18]       | mTOR              | downregulated             | EGCG 150 +LPS vs LPS alone 1.46 fold decrease                                                                      |
| AKT Serine/Threonine Kinase 1 (AKT1)<br><br>AKT3 aka Thymoma viral proto-oncogene 3                           | An enzyme that is associated with insulin signaling in the brain<br><br>Serine Threonine protein kinase acting on the brain             | [19-21]    | mTOR/PI3k-Akt     | downregulated             | EGCG 150 +LPS vs. LPS alone 1.49 fold decrease (AKT3)<br><br>EGCG 150 +LPS vs. LPS alone 1.54 fold decrease (AKT1) |

|                                                                                         |                                                                                                                                      |      |               |               |                                                 |
|-----------------------------------------------------------------------------------------|--------------------------------------------------------------------------------------------------------------------------------------|------|---------------|---------------|-------------------------------------------------|
|                                                                                         | may exhibit neuroprotective properties or serve to heighten ROS                                                                      |      |               |               |                                                 |
| Insulin 2 (INS2)                                                                        | A gene that codes for preproinsulin                                                                                                  | [22] | mTOR          | upregulated   | EGCG 150 +LPS vs. LPS alone 10.42 fold increase |
| Phospholipase D2 (PLD2)                                                                 | It is an enzyme that modulates membrane phospholipid activity, which may serve as a biomarker for aberrant protein aggregation in AD | [23] | mTOR          | upregulated   | EGCG 150 +LPS vs. LPS alone 1.78 fold increase  |
| SMAD Family Member 3 (SMAD3), aka Mothers against decapentaplegic homolog 3             | An effector of TGF- $\beta$ signaling and enhancer of NF $\kappa$ B, but it also may affect aging in neurodegenerative disorders     | [24] | NF $\kappa$ B | downregulated | EGCG 150 +LPS vs. LPS alone 1.66 fold decrease  |
| C-C Motif Chemokine Ligand 5 (CCL5)<br><br>aka Regulated upon Activation, Normal T Cell | A chemokine that exhibits proinflammatory properties in microglia and in AD.                                                         | [25] | NF $\kappa$ B | downregulated | EGCG 150 +LPS vs LPS alone 1.30 fold decrease   |

| Expressed and Presumably Secreted (RANTES)                            |                                                                                                                                                                                    |      |      |               |                                                                                                                                                                                   |
|-----------------------------------------------------------------------|------------------------------------------------------------------------------------------------------------------------------------------------------------------------------------|------|------|---------------|-----------------------------------------------------------------------------------------------------------------------------------------------------------------------------------|
| Nucleotide-binding oligomerization domain-containing protein 1 (NOD1) | Intracellular inspectors of inflammation serve as biomarkers for aberrant cellular action                                                                                          | [26] | NFκB | downregulated | EGCG 150 +LPS vs LPS alone 1.43 fold decrease                                                                                                                                     |
| Heme Oxygenase 1 (HMOX1)                                              | Enzymes with antioxidative action, which may act as a regulator of ferroptosis                                                                                                     | [27] | NFκB | upregulated   | EGCG 150 +LPS vs LPS alone 3.24 fold increase                                                                                                                                     |
| Tnf receptor-associated factors (TRAF 2,3 and 5)                      | Constitutive elements have been implicated as biomarkers for AD, especially Traf2. They regulate autophagy, cytokine activity, and cellular development.                           | [28] | NFκB | downregulated | EGCG 150 +LPS vs LPS alone 1.49 fold decrease (Traf2)<br><br>EGCG 150 +LPS vs LPS alone 1.42 fold decrease (Traf 3)<br><br>EGCG 150 +LPS vs LPS alone 1.88 fold decrease (Traf 5) |
| Tumor Necrosis Factor (TNF)                                           | A known inflammatory signaling pathway that involves the cytokine TNF-α, which is known to present inflammation in microglia. This gene is a biomarker for neuroinflammation in AD | [29] | NFκB | upregulated   | EGCG 150 +LPS vs LPS alone 4.01 fold increase                                                                                                                                     |

|                                                         |                                                                                                                                                                    |          |                   |               |                                                                                                                                                                                     |
|---------------------------------------------------------|--------------------------------------------------------------------------------------------------------------------------------------------------------------------|----------|-------------------|---------------|-------------------------------------------------------------------------------------------------------------------------------------------------------------------------------------|
| tumor necrosis factor alpha-induced protein 3 (TNFAIP3) | This gene is shown to regulate autophagy and have anti-inflammatory properties.                                                                                    | [30]     | NFκB              | upregulated   | EGCG 150 +LPS vs. LPS alone 1.41 fold increase                                                                                                                                      |
| Toll-like receptors (TLR 1, 3, and 4) emphasis on TLR4  | Intracellular ligands are a form of pattern recognition receptors (PRRs) acting to mediate immunosurveillance and aging mechanisms.                                | [31, 32] | NFκB and PI3k-Akt | upregulated   | EGCG 150 +LPS vs. LPS alone 2.17 fold increase (TLR3)<br><br>EGCG 150 +LPS vs. LPS alone 1.86 fold increase and (TLR4)<br><br>EGCG 150 +LPS vs. LPS alone 3.05 fold increase (TLR1) |
| RelB Proto-Oncogene, NF-KB Subunit (RELB).              | Gene is important for the proper function of microglial and neural homeostasis.                                                                                    | [33]     | NF-κB             | downregulated | EGCG 150 +LPS vs. LPS alone 1.76 fold decrease                                                                                                                                      |
| Interleukin 1 beta (IL1B)                               | A cytokine that is linked to IL-1 receptor activity that functions in microglial inflammation and other CNS responsibilities, i.e., functioning as a growth factor | [34]     | NF-κB             | downregulated | EGCG 150 +LPS vs. LPS alone 1.16 fold decrease                                                                                                                                      |

|                                                                                                           |                                                                                                                                                                                        |          |                            |               |                                                                                                                                 |
|-----------------------------------------------------------------------------------------------------------|----------------------------------------------------------------------------------------------------------------------------------------------------------------------------------------|----------|----------------------------|---------------|---------------------------------------------------------------------------------------------------------------------------------|
| Nuclear Factor Kappa B2 (Nf- $\kappa$ B2)                                                                 | The gene encodes a subunit of NF $\kappa$ B. NF $\kappa$ B is a transcription factor that is responsible for a multitude of cellular activities, but in microglia, it may regulate Tau | [35]     | NF $\kappa$ B              | downregulated | EGCG 150 +LPS vs. LPS alone 1.62 fold decrease                                                                                  |
| FBJ osteosarcoma oncogene AP-1 Transcription Factor Subunit (FOS) aka c-fos or Activator Protein 1 (AP-1) | Transcription mediators correlated with control of inflammation and microglial development. It functions to control proper brain maturation.                                           | [36, 37] | NF $\kappa$ B and PI3k-akt | downregulated | EGCG 150 +LPS vs. LPS alone 2.03 fold decrease (NF $\kappa$ B)<br><br>EGCG 150 +LPS vs. LPS alone 1.84 fold decrease (PI3K-Akt) |
| Signal Transducer And Activator Of Transcription 1 (STAT1)                                                | Important transcription factors involved in aging and neurodegenerative activity                                                                                                       | [38]     | NF $\kappa$ B              | downregulated | EGCG 150 +LPS vs. LPS alone 2.14 fold decrease                                                                                  |
| Glutathione Peroxidases (GPX 1 and 4)                                                                     | Enzymes implicated in oxidative stress regulation related to neurodegeneration.                                                                                                        | [39]     | NO                         | downregulated | EGCG 150 + vs. LPS alone 2.63 fold decrease (Gpx1)<br><br>EGCG 150 +LPS vs. LPS alone 2.84 fold decrease (Gpx4)                 |

|                                                                                      |                                                                                             |          |          |               |                                                |
|--------------------------------------------------------------------------------------|---------------------------------------------------------------------------------------------|----------|----------|---------------|------------------------------------------------|
| Cathepsin B (CTSB)                                                                   | Lysosomal cysteine protease is active in protein aggregation in neurodegenerative ailments. | [40]     | NO       | downregulated | EGCG 150 +LPS vs. LPS alone 3.30 fold decrease |
| Immunity-related GTPase family M protein (Irgm1), aka interferon-inducible protein 1 | The enzyme displays autophagic properties.                                                  | [41]     | NO       | downregulated | EGCG 150 +LPS vs. LPS alone 3.46 fold decrease |
| Nitric Oxide Synthase 1 neuronal (NOS1)                                              | The enzyme that modulates NO activity in the brain may be a possible link to INOS           | [42]     | NO       | downregulated | EGCG 150 +LPS vs. LPS alone 2.05 fold decrease |
| Phosphoprotein enriched in astrocytes 15A (elf4e )                                   | Protein that is known to function in apoptosis but may have autophagic regulative abilities | [43, 44] | NO       | downregulated | EGCG 150 +LPS vs. LPS alone 1.57 fold decrease |
| Growth factor receptor bound protein 2-associated protein 1 (GAB1)                   | The molecule that acts to mediate cognitive function                                        | [45]     | NO       | upregulated   | EGCG 150 +LPS vs. LPS alone 2.15 fold increase |
| Cyclin-dependent kinase inhibitor 1B (CDKN1B)                                        | Involved in cell cycle arrest and currently being studied for its presumed prevention of AD | [46]     | PI3k-Akt | downregulated | EGCG 150 +LPS vs. LPS alone 2.14 fold decrease |



|                                                     |                                                                                                                                                      |          |          |               |                                                                                                     |
|-----------------------------------------------------|------------------------------------------------------------------------------------------------------------------------------------------------------|----------|----------|---------------|-----------------------------------------------------------------------------------------------------|
|                                                     |                                                                                                                                                      |          |          |               |                                                                                                     |
| Growth factor receptor-bound protein 2 (GRB2)       | A signaling adaptor domain associated with activated Cdc42-associated kinase 1(ACK1) mediates TLR signaling. It seems to interact with amyloid beta. | [47, 48] | PI3k-Akt | downregulated | EGCG 150 +LPS vs. LPS alone 1.36 fold decrease                                                      |
| Insulin-like growth factor I receptor (IGF1R)       | Receptors involved in managing IGF-1, which controls aging and neuroinflammation.                                                                    | [49, 50] | PI3k-Akt | downregulated | EGCG 150 +LPS vs. LPS alone 1.55 fold decrease                                                      |
| V-raf-leukemia viral oncogene 1 (RAF1)              | An initiator of Extracellular signal-regulated kinase (ERK) signaling that is expressed highly in the AD brain                                       | [51]     | PI3k-Akt | downregulated | EGCG 150 +LPS vs LPS alone 1.94 fold decrease                                                       |
| Eukaryotic translation initiation factor 4E (ELF4E) | Translational modulator altered in AD.                                                                                                               | [52]     | PI3K-AKT | upregulated   | LPS alone vs. control 8.64 fold increase<br><br>Both EGCG 150 +LPS vs. LPS alone 3.45 fold increase |

|                                                                      |                                                                                                                                                                                 |         |          |               |                                                 |
|----------------------------------------------------------------------|---------------------------------------------------------------------------------------------------------------------------------------------------------------------------------|---------|----------|---------------|-------------------------------------------------|
|                                                                      |                                                                                                                                                                                 |         |          |               |                                                 |
| Son of sevenless homolog 1 (Drosophila) (SOS1)                       | A guanine nucleotide exchange factor (GEF) that interacts with RAS                                                                                                              | [53]    | PI3k-Akt | downregulated | EGCG 150 +LPS vs. LPS alone 1.70 fold decrease  |
| Glucuronidase, beta (GUSB)                                           | The gene that codes for the processing of $\beta$ glucuronidase, which is involved in the lysosomal breakdown of large cells glycosaminoglycans (GAGs), May be connected to AD. | [54]    | PI3k-Akt | downregulated | EGCG 150 +LPS vs. LPS alone 1.42 fold decrease  |
| The regulatory-associated protein of MTOR, complex 1 (RPTOR)         | The regulative gene that modulates the nutrient-sensing capabilities of mTORC1                                                                                                  | [55]    | mTOR     | downregulated | EGCG 150 +LPS vs. LPS alone 1.72 fold decrease  |
| Protein kinase, AMP-activated, beta 2 non-catalytic subunit (PRKAB2) | A gene associated with AMPK in regulating energy and cellular bioenergetics along with mTORC1                                                                                   | [56]    | mTOR     | downregulated | EGCG 150 +LPS vs. LPS alone 1.516 fold decrease |
| Cytochrome b-245, alpha polypeptide (CYBA)                           | The gene that encodes for a unit associated with the nicotinamide adenine dinucleotide phosphate oxidase (NADPH) complex that produces superoxide                               | [57-59] | NO       | downregulated | EGCG 150 +LPS vs. LPS alone 3.18 fold decrease  |

|                                                          |                                                                                                                                |         |    |               |                                               |
|----------------------------------------------------------|--------------------------------------------------------------------------------------------------------------------------------|---------|----|---------------|-----------------------------------------------|
|                                                          | dismutase (SOD) and is involved in phagocytosis                                                                                |         |    |               |                                               |
| Hepsin (HPN)                                             | A transmembrane serine protease involved in many cellular process but may have a role in activating matrix metalloproteinases. | [60-62] | NO | downregulated | EGCG 150 +LPS vs LPS alone 3.08 fold decrease |
| Growth Arrest and DNA Damage Inducible Protein (GADD45A) | A thoroughly studied protein involved in aging, molecular stress control, DNA repair, and cellular development                 | [63-66] | NO | downregulated | EGCG 150+ LPS vs LPS alone 2.42 fold decrease |

## References

- Calandra, T. and T. Roger, *Macrophage migration inhibitory factor: a regulator of innate immunity*. Nat Rev Immunol, 2003. **3**(10): p. 791–800.
- Nasiri, E., et al., *Key role of MIF-related neuroinflammation in neurodegeneration and cognitive impairment in Alzheimer's disease*. Mol Med, 2020. **26**(1): p. 34.
- Xuan, W., et al., *Dualistic roles and mechanistic insights of macrophage migration inhibitory factor in brain injury and neurodegenerative diseases*. J Cereb Blood Flow Metab, 2022: p. 271678x221138412.
- Bose, S. and J. Cho, *Role of chemokine CCL2 and its receptor CCR2 in neurodegenerative diseases*. Arch Pharm Res, 2013. **36**(9): p. 1039-50.
- Joly-Amado, A. et al., *CCL2 Overexpression in the Brain Promotes Glial Activation and Accelerates Tau Pathology in a Mouse Model of Tauopathy*. Front Immunol, 2020. **11**: p. 997.
- Zambrano, A. et al., *Interleukin-3 prevents neuronal death induced by amyloid peptide*. BMC Neurosci, 2007. **8**: p. 82.
- Klein, R.S., *Astrocyte interleukin-3 preps microglia*. Trends Immunol, 2021. **42**(11): p. 937-939.
- Fung, K.Y., et al., *Emerging roles for IL-11 in inflammatory diseases*. Cytokine, 2022. **149**: p. 155750.
- Zhang, B. et al., *Interleukin-11 treatment protected against cerebral ischemia/reperfusion injury*. Biomed Pharmacother, 2019. **115**: p. 108816.
- Lyra, ESNM, et al., *Proinflammatory interleukin-6 signaling links cognitive impairments and peripheral metabolic alterations in Alzheimer's disease*. Transl Psychiatry, 2021. **11**(1): p. 251.
- Chachlaki, K. and V. Prevot, *Nitric oxide signalling in the brain and its control of bodily functions*. Br J Pharmacol, 2020. **177**(24): p. 5437-5458.
- Streczek, J., et al., *Turmeric Extract (Curcuma longa) Mediates Antioxidative Effects by Reduction of Nitric Oxide, iNOS Protein-, and mRNA-Synthesis in BV2 Microglial Cells*. Molecules, 2022. **27**(3).
- Chitu, V., et al., *Microglial Homeostasis Requires Balanced CSF-1/CSF-2 Receptor Signaling*. Cell Rep, 2020. **30**(9): p. 3004-3019.e5.
- Spath, S., et al., *Dysregulation of the Cytokine GM-CSF Induces Spontaneous Phagocyte Invasion and Immunopathology in the Central Nervous System*. Immunity, 2017. **46**(2): p. 245-260.
- Frenkel, D., *A new TRAIL in Alzheimer's disease therapy*. Brain, 2015. **138**(Pt 1): p. 8-10.

16. Moens, U., S. Kostenko, and B. Sveinbjörnsson, *The Role of Mitogen-Activated Protein Kinase-Activated Protein Kinases (MAPKAPKs) in Inflammation*. Genes (Basel), 2013. **4**(2): p. 101-33.
17. Wen, J., R. Ribeiro, and Y. Zhang, *Specific PKC isoforms regulate LPS-stimulated iNOS induction in murine microglial cells*. J Neuroinflammation, 2011. **8**: p. 38.
18. Sabatini, D.M., *Twenty-five years of mTOR: Uncovering the link from nutrients to growth*. Proc Natl Acad Sci U S A, 2017. **114**(45): p. 11818-11825.
19. Gabbouj, S., et al., *Altered Insulin Signaling in Alzheimer's Disease Brain - Special Emphasis on PI3K-Akt Pathway*. Front Neurosci, 2019. **13**: p. 629.
20. Polyarchou, C., et al., *Akt3 induces oxidative stress and DNA damage by activating the NADPH oxidase via phosphorylation of p47(phox)*. Proc Natl Acad Sci U S A, 2020. **117**(46): p. 28806-28815.
21. DuBois, J.C., et al., *Akt3-Mediated Protection Against Inflammatory Demyelinating Disease*. Front Immunol, 2019. **10**: p. 1738.
22. Ardestani, A., et al., *mTORC1 Signaling: A Double-Edged Sword in Diabetic  $\beta$  Cells*. Cell Metab, 2018. **27**(2): p. 314-331.
23. Kosicek, M. and S. Hecimovic, *Phospholipids and Alzheimer's disease: alterations, mechanisms and potential biomarkers*. Int J Mol Sci, 2013. **14**(1): p. 1310-22.
24. Tichauer, J.E., et al., *Age-dependent changes on TGF $\beta$ 1 Smad3 pathway modify the pattern of microglial cell activation*. Brain Behav Immun, 2014. **37**: p. 187-96.
25. Zuena, A.R., et al., *Chemokines in Alzheimer's Disease: New Insights Into Prokineticins, Chemokine-Like Proteins*. Front Pharmacol, 2019. **10**: p. 622.
26. Mukherjee, T., et al., *NOD1 and NOD2 in inflammation, immunity and disease*. Arch Biochem Biophys, 2019. **670**: p. 69-81.
27. Campbell, N.K., H.K. Fitzgerald, and A. Dunne, *Regulation of inflammation by the antioxidant haem oxygenase 1*. Nat Rev Immunol, 2021. **21**(7): p. 411-425.
28. Culpán, D., et al., *TNFR-associated factor-2 (TRAF-2) in Alzheimer's disease*. Neurobiol Aging, 2009. **30**(7): p. 1052-60.
29. Oh, S.L., et al., *Alzheimer's Disease Blood Biomarkers Associated With Neuroinflammation as Therapeutic Targets for Early Personalized Intervention*. Front Digit Health, 2022. **4**: p. 875895.
30. Chen, J., et al., *TNFAIP3 ameliorates the degeneration of inflammatory human nucleus pulposus cells by inhibiting mTOR signaling and promoting autophagy*. Aging (Albany NY), 2020. **12**(23): p. 24242-24254.
31. Shaw, A.C., et al., *dysregulation of human Toll-like receptor function in aging*. Ageing Res Rev, 2011. **10**(3): p. 346-53.
32. Fiebich, B.L., et al., *Role of Microglia TLRs in Neurodegeneration*. Front Cell Neurosci, 2018. **12**: p. 329.
33. Mockenhaupt, K., A. Gonsiewski, and T. Kordula, *RelB and Neuroinflammation*. Cells, 2021. **10**(7).
34. Liu, X. and N. Quan, *Microglia and CNS Interleukin-1: Beyond Immunological Concepts*. Front Neurol, 2018. **9**: p. 8.
35. Wang, C., et al., *Microglial NF- $\kappa$ B drives Tau spreading and toxicity in a mouse model of tauopathy*. Nat Commun, 2022. **13**(1): p. 1969.
36. Holtman, I.R., D. Skola, and CK Glass, *Transcriptional control of microglia phenotypes in health and disease*. J Clin Invest, 2017. **127**(9): p. 3220-3229.
37. Velazquez, F.N., B.L. Caputto, and F.D. Boussin, *c-Fos importance for brain development*. Aging (Albany NY), 2015. **7**(12): p. 1028-9.
38. Butturini, E., et al., *STAT1 drives M1 microglia activation and neuroinflammation under hypoxia*. Arch Biochem Biophys, 2019. **669**: p. 22-30.
39. Ansari, M.A. and S.W. Scheff, *Oxidative stress in the progression of Alzheimer disease in the frontal cortex*. J Neuropathol Exp Neurol, 2010. **69**(2): p. 155-67.
40. Tsujimura, A., et al., *Lysosomal enzyme cathepsin B enhances the aggregate forming activity of exogenous  $\alpha$ -synuclein fibrils*. Neurobiol Dis, 2015. **73**: p. 244-53.
41. He, S., et al., *Immune-related GTPase M (IRGM1) regulates neuronal autophagy in a mouse model of stroke*. Autophagy, 2012. **8**(11): p. 1621-7.
42. Mattila, J.T. and A.C. Thomas, *Nitric oxide synthase: non-canonical expression patterns*. Front Immunol, 2014. **5**: p. 478.
43. Fiory, F., et al., *Frontiers: PED/PEA-15, a multifunctional protein controlling cell survival and glucose metabolism*. Am J Physiol Endocrinol Metab, 2009. **297**(3): p. E592-601.
44. Böck, B.C., et al., *The PEA-15 protein regulates autophagy via activation of JNK*. J Biol Chem, 2010. **285**(28): p. 21644-54.
45. Lu, N.N., et al., *Cholinergic Grb2-Associated-Binding Protein 1 Regulates Cognitive Function*. Cereb Cortex, 2018. **28**(7): p. 2391-2404.
46. Malhotra, N., R. Gupta, and P. Kumar, *Pharmacological relevance of CDK inhibitors in Alzheimer's disease*. Neurochem Int, 2021. **148**: p. 105115.
47. Jing, L., et al., *ACK1 Contributes to the Pathogenesis of Inflammation and Autoimmunity by Promoting the Activation of TLR Signaling Pathways*. Front Immunol, 2022. **13**: p. 864995.
48. Raychaudhuri, M. and D. Mukhopadhyay, *Grb2-mediated alteration in the trafficking of AbetaPP: insights from Grb2-AICD interaction*. J Alzheimers Dis, 2010. **20**(1): p. 275-92.

49. Gubbi, S., et al., *40 YEARS of IGF1: IGF1: the Jekyll and Hyde of the aging brain*. J Mol Endocrinol, 2018. **61**(1): p. T171-t185.
50. Labandeira-Garcia, J.L., et al., *Insulin-Like Growth Factor-1 and Neuroinflammation*. Front Aging Neurosci, 2017. **9**: p. 365.
51. Mei, M., et al., *Distribution, levels and phosphorylation of Raf-1 in Alzheimer's disease*. J Neurochem, 2006. **99**(5): p. 1377-88.
52. Ghosh, A., et al., *Alzheimer's disease-related dysregulation of mRNA translation causes key pathological features with ageing*. Transl Psychiatry, 2020. **10**(1): p. 192.
53. Johnson, D.S. and Y.H. Chen, *Ras family of small GTPases in immunity and inflammation*. Curr Opin Pharmacol, 2012. **12**(4): p. 458-63.
54. Hwang, J., et al., *The Role of Lysosomes in a Broad Disease-Modifying Approach Evaluated across Transgenic Mouse Models of Alzheimer's Disease and Parkinson's Disease and Models of Mild Cognitive Impairment*. Int J Mol Sci, 2019. **20**(18).
55. Kim, D.H., et al., *mTOR interacts with raptors to form a nutrient-sensitive complex that signals to the cell growth machinery*. Cell, 2002. **110**(2): p. 163-75.
56. Sukumaran, A., K. Choi, and B. Dasgupta, *Insight on Transcriptional Regulation of the Energy Sensing AMPK and Biosynthetic mTOR Pathway Genes*. Front Cell Dev Biol, 2020. **8**: p. 671.
57. Shimohama, S., et al., *Activation of NADPH oxidase in Alzheimer's disease brains*. Biochem Biophys Res Commun, 2000. **273**(1): p. 5-9.
58. Ma, MW, et al., *NADPH oxidase in brain injury and neurodegenerative disorders*. Mol Neurodegener, 2017. **12**(1): p. 7.
59. Shahraz, A., et al., *Phagocytosis-related NADPH oxidase 2 subunit gp91phox contributes to neurodegeneration after repeated systemic challenge with lipopolysaccharides*. Glia, 2021. **69**(1): p. 137-150.
60. Li, S., et al., *Hepsin: a multifunctional transmembrane serine protease in pathobiology*. Febs j, 2021. **288**(18): p. 5252-5264.
61. Wilkinson, D.J., et al., *The serine proteinase hepsin is an activator of pro-matrix metalloproteinases: molecular mechanisms and implications for extracellular matrix turnover*. Sci Rep, 2017. **7**(1): p. 16693.
62. Zipfel, P., et al., *Matrix Metalloproteinases as New Targets in Alzheimer's Disease: Opportunities and Challenges*. J Med Chem, 2020. **63**(19): p. 10705-10725.
63. Sultan, F.A. and J.D. Sweatt, *The role of the Gadd45 family in the nervous system: a focus on neurodevelopment, neuronal injury, and cognitive neuroepigenetics*. Adv Exp Med Biol, 2013. **793**: p. 81-119.
64. Moskalev, A.A., et al., *Gadd45 proteins: relevance to aging, longevity, and age-related pathologies*. Ageing Res Rev, 2012. **11**(1): p. 51-66.
65. Zaidi, M.R. and D.A. Liebermann, *Gadd45 in Senescence*. Adv Exp Med Biol, 2022. **1360**: p. 109-116.
66. Torp, R., et al., *GADD45 is induced in Alzheimer's disease and protects against apoptosis in vitro*. Neurobiol Dis, 1998. **5**(4): p. 245-52.
